# Supplementary material for: The Divergent Immunomodulatory Effects of Short Chain Fatty Acids and Medium Chain Fatty Acids
Source: MDPI journal article supplement (doi:10.3390/ijms22126453), 2021-06-16
Supplement: s1 [file s1]

Supplementary Figure S1:

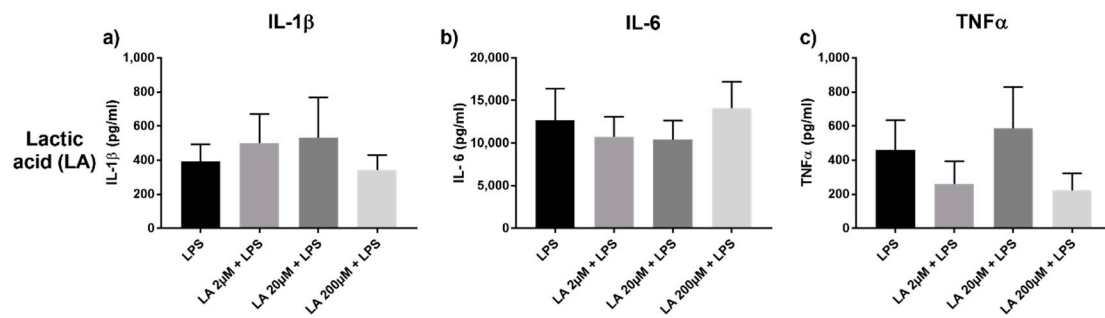

**Supplementary Figure S1.** Cytokine production of IL-1 $\beta$ , IL-6 and TNF $\alpha$  in the supernatants of PBMC stimulated with LPS and 2, 20, 200  $\mu$ M of lactic acid, assessed by ELISA. Human PBMC were co-incubated with LPS and lactic acid (LA) (a, b, c). Values were presented as mean  $\pm$  standard error of the mean (SEM), results from at least 7 subjects were used. No significance seen using Wilcoxon signed rank test for pair-wise comparisons with the LPS control (black bar).

Supplementary Figure S2:

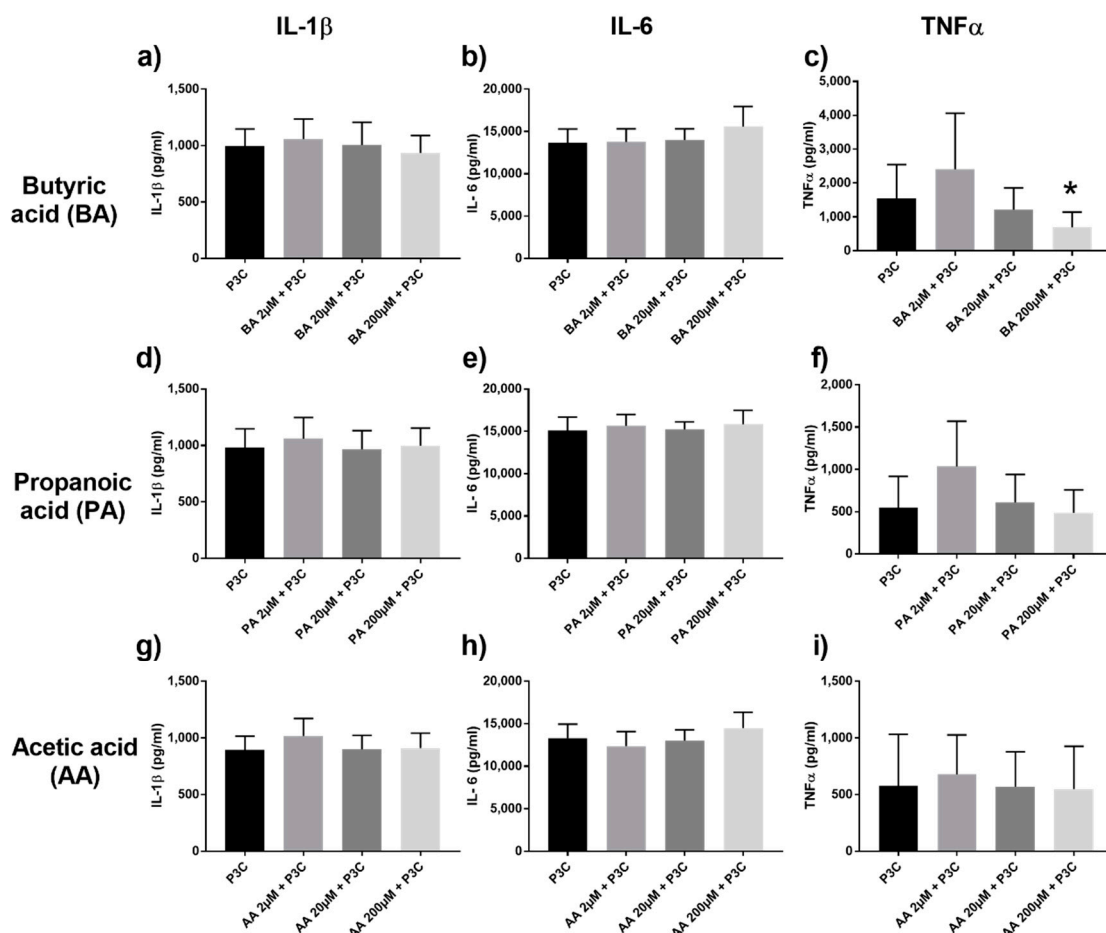

**Supplementary Figure S2.** Cytokine production of IL-1 $\beta$ , IL-6 and TNF $\alpha$  in the supernatants of PBMC stimulated with P3C and 2, 20, 200  $\mu$ M of SCFA, assessed by ELISA. Human PBMC were co-incubated with P3C and butyric acid (BA) (a, b, c), propanoic acid (PA) (d, e, f), or acetic acid (AA) (g, h, i). Values

## The Divergent Immunomodulatory Effects of SCFA and MCFA

were presented as mean  $\pm$  SEM, results from at least 7 subjects were used. Wilcoxon signed rank test to determine significance for pair-wise comparisons with the control, \* $p < 0.05$  is the cytokine level difference compared to the control P3C group (black bar).

Supplementary Figure S3:

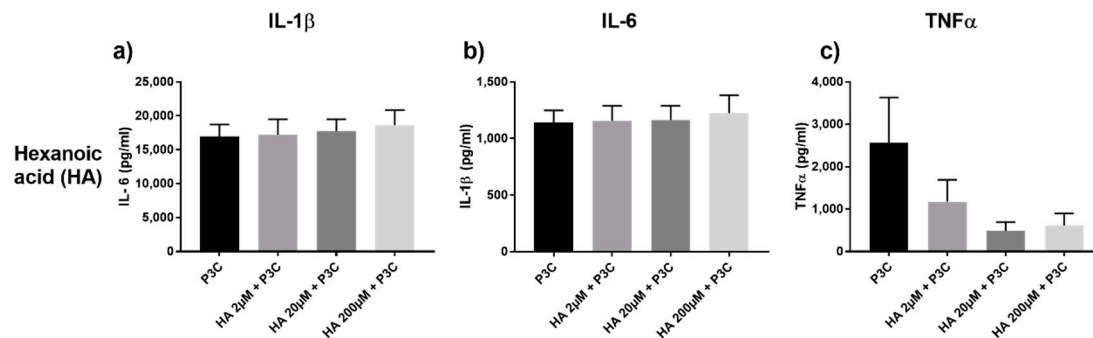

**Supplementary Figure S3.** Cytokine IL-1 $\beta$ , IL-6, and TNF $\alpha$  production in the supernatants of PBMC stimulated with P3C and 2, 20, 200  $\mu$ M of hexanoic acid (HA) (a, b, c). Values were presented as mean  $\pm$  SEM, results from at least 7 subjects were used. No significance seen using Wilcoxon signed rank test for pair-wise comparisons with the P3C control (black bar).

Supplementary Figure S4:

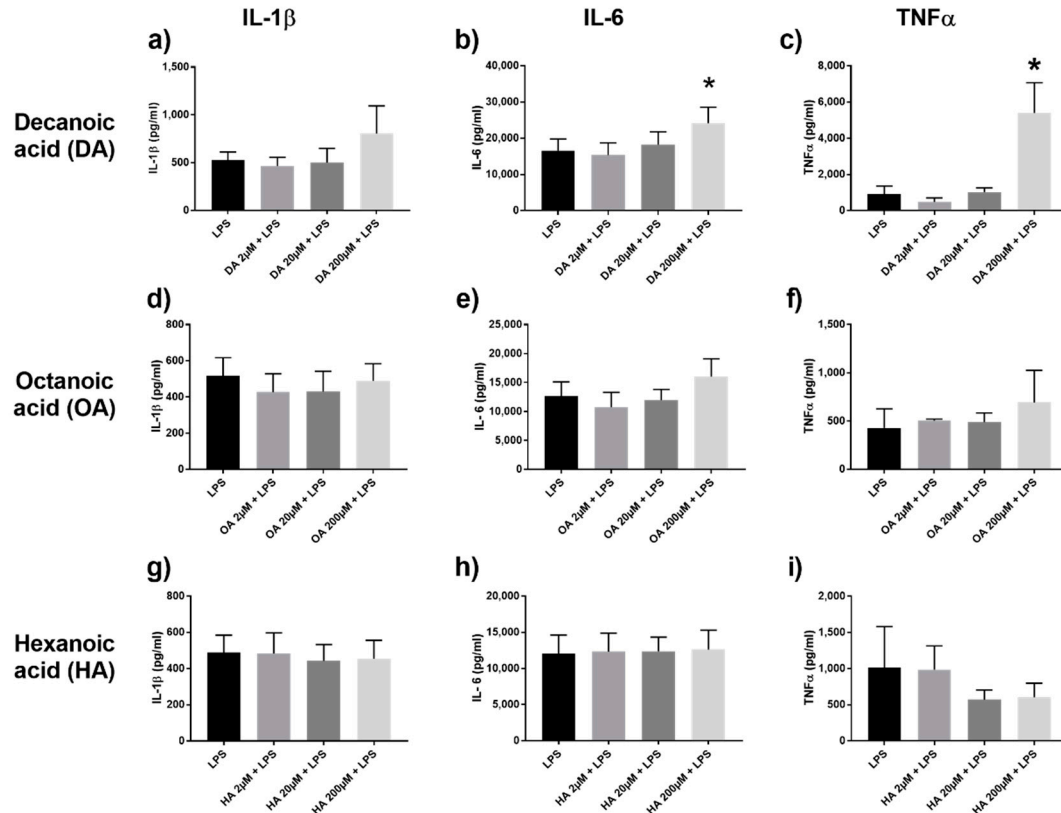

**Supplementary Figure S4.** Cytokine IL-1 $\beta$ , IL-6, and TNF $\alpha$  production in the supernatants of PBMC stimulated with LPS and 2, 20, 200  $\mu$ M of decanoic acid (DA) (a, b, c), octanoic acid (OA) (d, e, f), hexanoic acid (HA) (d, e, f). Values were presented as mean  $\pm$  SEM, results from at least 7 subjects were used. Wilcoxon signed rank test to determine significance for pair-wise comparisons with the control, \*p<0.05 is the cytokine level difference compared to the control LPS group (black bar).

Supplementary Figure S5:

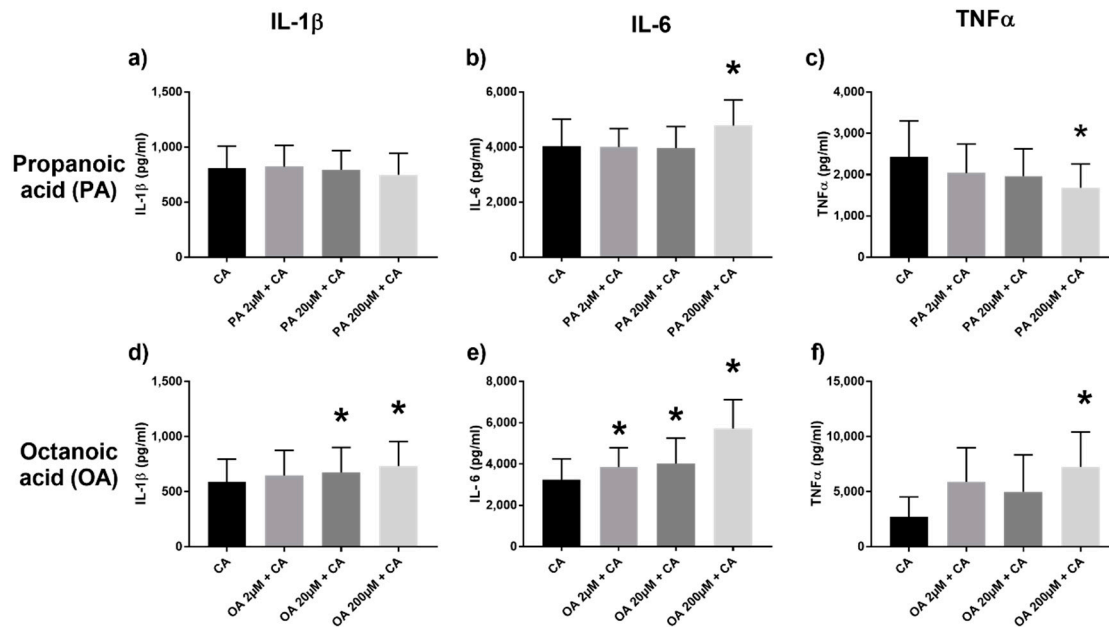

**Supplementary Figure S5.** Cytokine IL-1 $\beta$ , IL-6, and TNF $\alpha$  production in the supernatants of PBMC stimulated with CA and 2, 20, 200  $\mu$ M of propanoic acid (PA) (a, b, c), and octanoic acid (OA) (d, e, f). Values were presented as mean  $\pm$  SEM, results from at least 7 subjects were used. Wilcoxon signed rank test to determine significance for pair-wise comparisons with the control, \*p<0.05 is the cytokine level difference compared to the control CA group (black bar).
